# Supplementary material for: UPLC-ESI-MS/MS Profile and Antioxidant, Cytotoxic, Antidiabetic, and Antiobesity Activities of the Aqueous Extracts of Three Different Hibiscus Species
Source: Hindawi journal article supplement (doi:10.1155/2020/6749176), 2020-06-25
Supplement: f1 [file 6749176.f1.docx]

**Table 1: Metabolites identified in the aqueous extract of three different *Hibiscus deﬂersii* (HdA), *H. micranthus* (HmA)*,* and *H. calyphyllus* (HcA)using UPLC−ESI−MS in negative and positive ionization modes.**

| Comp.  No. | Compound name | Rt (min.) | [M− H]−  (*m/z*) | [M+H]+ (*m/z*) | MS2 fragments (*m/z*) | HdA | HcA | HmA | Ref. |
| --- | --- | --- | --- | --- | --- | --- | --- | --- | --- |
| 1 | L-ascorbic acid | 0.30 |  | 177 | 133, 129, 127, 113, 103, 101, 57 | √ | √ | √ | 1 |
| 2 | Oleuropein | 0.82 | 539 |  | 377, 341, 307, 215, 179 | √ |  | √ | 2 |
| 3 | Succinic acid* | 0.86 |  | 119 | 101 | √ |  |  | -- |
| 4 | Tyrosol | 0.93 |  | 121 | 103, 97,93, 89, 79, 77, 73, 65, 45 | √ |  |  | 3 |
| 5 | Sucrose | 0.95 | 341 |  | 179 (M-H-162)-, 161. 131, 119, 117, 113, 103, 101, 89, 87, 71, 59 |  |  | √ | 4 |
| 6 | Hydroxycitric acid derivative | 1.36 |  | 593 | 209 |  | √ |  | 1 |
| 7 | Butein | 1.43 |  | 273 | 163, 143, 137 | √ |  |  | 5 |
| 8 | Apigenin-*C*-hexoside -*C*-pentoside | 1.53 | 563 |  | 545 (M-H-18)-, 443 (M-H-120)-, 431 (M-H-132)-, 353 (M-H-120-90)-, 341 (M-H-132-90)-, 311 (M-H-132-120)- |  | √ |  | 6 |
| 9 | L-ascorbic acid isomer | 1.81 |  | 177 | 133, 129, 127, 113, 103, 101, 57 |  |  | √ | 1 |
| 10 | N-feruolyl tyramine | 3.32 |  | 314 | 235, 181, 177, 145, 121, 103, 93, 45 |  |  | √ | 1 |
| 11 | Cyanidin 3-*O*-galactoside | 3.57 |  | 449 | 287, 137 |  | √ |  | 7, 8 |
| 12 | L-ascorbic acid isomer | 4.52 |  | 177 | 133, 129, 127, 113, 103, 101, 57 | √ |  |  | 1 |
| 13 | Patuletin (6-Methoxyquercetin) | 4.97 |  | 333 | 318, 301, 169, 155 | √ |  |  | 9 |
| 14 | Succinic acid isomer | 6.05 | 117 |  | 99 (M-H-18)- | √ |  |  | 10 |
| 15 | Diosmetin-7-*O*- glucuronide -3´-*O*-pentoside | 6.31 | 607 |  | 475 (M-H-132)-, 299 (M-H-132-176)-, 179 |  |  | √ | 11 |
| 16 | L-ascorbic acid isomer | 6.32 |  | 177 | 133, 129, 127, 113, 103, 101, 57 |  | √ |  | 1 |
| 17 | Succinic acid isomer | 6.49 | 117 |  | 117, 99 |  |  | √ | 10 |
| 18 | Cyanidin 3-*O*-sambubioside | 6.76 | 579 |  | 339, 285 |  | √ |  | 12 |
| 19 | Apigenin-*C*-hexoside -*C*-pentoside isomer | 7.02 | 563 |  | 545 (M-H-18)-, 443 (M-H-120)-, 431 (M-H-132)-, 341 (M-H-132-90)-, 311 (M-H-132-120)- | √ |  |  | 13 |
| 20 | Vicenin (apigenin 6,8- di *C*- glucoside) | 7.10 | 593 |  | 473 (M-H-120)-, 383 (M-H-120-90)-, 285 | √ |  |  | 14, 15 |
| 21 | Kaempferol 3-*O*- rutinoside / Luteolin 7-*O*- rutinoside | 7.25 | 593 |  | 285 (M-H-Rut.)- | √ |  |  | 16/ 17 |
| 22 | Apiin (Apigenin-7-apioglucoside) | 7.29 | 563 |  | 443, 413, 269 (M-H-132-162)- |  | √ |  | 5, 18 |
| 23 | Apiin isomer | 7.31 |  | 565 | 433 (M+H-132)+, 413, 271(M+H-162- 132)+ | √ |  |  | 5 |
| 24 | Cyanidin 3-*O*-glucoside | 7.37 |  | 494 | 287 (M+H-162)+, 137 | √ |  |  | 3 |
| 25 | Diosmetin *C*-glucoside *C*-pentoside* | 7.37 | 593 |  | 413 (M-H-90-90)-, 383 (M-H-90-120)- |  | √ |  | -- |
| 26 | Tyrosol isomer | 7.46 |  | 121 | 93, 77 |  | √ |  | 3 |
| 27 | Orientin (Luteolin 8-*C*-glucoside) | 7.46 | 447 |  | 357 (M-H-90)-, 327 (M-H-120)-, 297 (M-H-150)-, 285(M-H-162)- | √ |  |  | 13, 15, 19, 20 |
| 28 | Delphinidin malonyl glucoronide* | 7.59 |  | 565 | 303 (M+H-176-86)+ |  | √ |  | -- |
| 29 | Methyl apigenin derivative* | 7.81 |  | 799 | 285 | √ |  |  | -- |
| 30 | Luteolin *C*‐ hexoside ‐*C*‐ pentoside | 7.82 | 579 |  | 489 (M-H-90-),459 (M-H-120)-, 429 (M-H-150)-, 411, 399, 369 (M-H-120-90)-, 365, 353, 339 (M-H-120-120)-, 299 |  |  | √ | 13 |
| 31 | Luteolin derivative | 7.98 | 737 |  | 285 |  | √ |  | 18, 21 |
| 32 | Schaftoside (Apigenin 6-*C*-glucoside 8-*C*-riboside) | 7.99 |  | 565 | 529, 511, 475, 457, 445, 427, 415(M+H-150)+,409, 391, 379, 361, 349, 337, 325, 307, 295, 273 |  |  | √ | 1, 22 |
| 33 | 4-Hydroxybenzoic acid | 7.99 |  | 139 | 121, 111, 105, 97, 93, 79 |  | √ |  | 1 |
| 34 | Peonidin -3-(*p*- coumaroyl-glucoside) | 8.27 |  | 609 | 301(M+H-146-162)+ |  | √ |  | 23 |
| 35 | Kaempferol 3-(*p*-coumarylglucoside) | 8.27 | 593 |  | 593, 447(M-H-146)-, 327, 285(M-H-146-162)- |  |  | √ | 24 |
| 36 | Apigenin *C*- hexoside -*C*- pentoside isomer | 8.32 | 563 |  | 545 (M-H-18)-, 473 (M-H-90)-, 443 (M-H-120)-, 431 (M-H-132)-, 353 (M-H-120-90)-, 341 (M-H-132-90)-, 311 (M-H-132-120)- | √ |  | √ | 13 |
| 37 | Kaempferol-3-*O*-glucoside | 8.41 | 447 |  | 285 |  | √ |  | 6, 8 |
| 38 | gamma-Eudesmol rhamnoside derivative | 8.47 | 577 |  | 439, 397, 379, 367, 349, 322, 293, 249, 197, 127 |  | √ |  | 1 |
| 39 | L-ascorbic acid isomer | 8.55 |  | 177 | 133, 129, 127, 113, 103, 101, 57 | √ |  |  | 1 |
| 40 | Peonidin -3-(*p*- coumaroyl-glucoside) isomer | 8.69 |  | 609 | 301(M+H-146-162)+ | √ | √ |  | 23 |
| 41 | Vicenin isomer | 8.89 | 593 |  | 473 (M-H-120)-, 395, 383 (M-120-90)-, 338, 327, 298 |  |  | √ | 15, 25 |
| 42 | Apiin isomer | 8.98 |  | 565 | 433 (M+H-132)+, 413, 271(M+H-162-132)+ | √ |  | √ | 5 |
| 43 | Apigenin -*C*- hexoside- *C*-pentoside isomer | 8.98 | 563 |  | 545 (M-H-18)-, 443 (M-H-120)-, 431 (M-H-132)-, 353 (M-H-120-90)-, 341 (M-H-132-90)-, 311 (M-H-132-120)- | √ |  |  | 6, 13 |
| 44 | Unknown | 9.04 | 319 |  | 239, 204, 195, 97 |  |  | √ | -- |
| 45 | Kaempferol 3-(*p*-coumarylglucoside) isomer | 9.12 | 593 |  | 447 (M-H-146)-, 327, 285(M-H-146-162)- | √ |  |  | 24 |
| 46 | Peonidin -3-(*p*- coumaroyl-glucoside) isomer | 9.37 |  | 609 | 609, 579, 463 (M+H-146)+, 301 (Peonidin) (M+H-146-162)+ | √ | √ | √ | 23 |
| 47 | Methyl apigenin-*C*-rhamnoside-*O*- glucoside* | 9.38 |  | 593 | 327 (M+H-162-104)+, 297 (M+H-162-134)+, 285 |  | √ |  | -- |
| 48 | Diosmetin-7-*O*-rutinoside | 9.50 | 607 |  | 607, 577, 461 (M-H-146)-, 299 (M-H-146-162)- | √ |  | √ | 26 |
| 49 | Luteolin hexoside | 9.55 |  | 449 | 287 (M+H-162)+ | √ |  |  | 5 |
| 50 | Luteolin *C*‐ hexoside ‐*C*‐ pentoside isomer | 9.63 | 579 |  | 369 (M-H-120-90)-, 339 (M-H-120-120)-, 322, 281, 259, 124 |  | √ |  | 13 |
| 51 | Schaftoside isomer | 9.94 |  | 565 | 529, 511, 475, 457, 445, 427, 415(M+H-150)+, 409, 391, 379, 361, 349, 337, 325, 307, 295, 273 |  | √ |  | 1, 22 |
| 52 | Succinic acid isomer | 10.01 | 117 |  | 99 |  | √ |  | 10 |
| 53 | L-ascorbic acid isomer | 10.36 |  | 177 | 133, 129, 127, 113, 103, 101, 57 |  | √ |  | 1 |
| 54 | Peonidin dirhamnoside* | 10.37 |  | 593 | 301 (M+H-146-146)+ | √ |  |  | -- |
| 55 | 3- Hydroxybenzoic acid | 10.49 |  | 139 | 105, 97, 93, 79 |  | √ |  | 1 |
| 56 | Acacetin-rhamnoglycoside | 10.61 | 591 |  | 283 (M-H-Rut.)-, 103, 58 | √ |  | √ | 18 |
| 57 | Kaempferol dimethyl ether dipentoside* | 10.68 |  | 579 | 579, 315 (M+H-132-132)+ |  |  | √ | -- |
| 58 | Peonidin glucoside feruloyl glucoronide | 10.82 |  | 815 | 463 (M+H-352 feruloyl glucoronide)+ | √ |  |  | 7 |
| 59 | 3- Hydroxybenzoic acid isomer | 10.94 |  | 139 | 105, 97, 93, 79 |  | √ |  | 1 |
| 60 | N-feruolyl tyramine isomer | 10.96 |  | 314 | 235, 218, 181, 177, 145, 121, 103, 93, 45 |  |  | √ | 1 |
| 61 | Unknown | 11.07 | 877 |  | 877, 813, 783, 557 |  | √ |  | -- |
| 62 | Apigenin –*O*-dihexoside | 11.38 | 593 |  | 269 (M-H-162-162)- |  | √ |  | 9 |
| 63 | Isorhamnetin-3-*O*-rutinoside | 11.59 | 623 |  | 315 (M-H-Rut.)-, 300, 271 | √ |  |  | 27 |
| 64 | Peonidin dirhamnoside isomer* | 11.69 |  | 593 | 447 (M+H-146)+, 301 (M+H-146-146)+ | √ | √ |  | -- |
| 65 | Acacetin-rhamnoglycoside isomer | 11.69 | 591 |  | 283 (M-H-Rut.)- | √ |  | √ | 18 |
| 66 | Succinic acid isomer | 11.78 | 117 |  | 99 |  | √ |  | 10 |
| 67 | Tyrosol isomer | 12.05 |  | 121 | 93, 77 |  | √ |  | 3 |
| 68 | Diosmetin rhamnoside feruloyl glucoronoide* | 12.46 | 797 |  | 445 (M-H-176-176)-, 299 (M-H-176-176-146)-, 237, 205 | √ |  |  | -- |
| 69 | Apiin isomer | 12.87 | 563 |  | 269 | √ |  |  | 18 |
| 70 | Succinic acid isomer | 12.90 | 117 |  | 99 |  | √ |  | 10 |
| 71 | Peonidin dipentoside* | 13.13 |  | 565 | 565, 301(M+H-132-132)+, 336 265, 195, 135, 91, 45 | √ |  |  | -- |
| 72 | Methyl gallate | 13.25 |  | 185 | 168, 124 |  | √ |  | 5 |
| 73 | Succinic acid isomer | 13.65 | 117 |  | 99 | √ |  |  | 10 |
| 74 | Delphinidin-3-arabinoside derivative | 15.40 |  | 799 | 435, 303 (M+H-364-132)+ | √ |  |  | 7, 23 |
| 75 | Hydroxy-octadecadienoic acid derivative | 15.57 | 593 |  | 295 (M-H-298)-, 277 (M-H-298- 18)-, 251(M-H-298-18-CO2)-, 195, 171 | √ |  |  | 28 |
| 76 | Syringic acid derivative | 15.83 | 377 |  | 197 |  | √ |  | 21 |
| 77 | 22-dehydroclerosterol | 16.00 |  | 393 | 393, 273, 173, 171, 130, 125 |  |  | √ | 1 |
| 78 | Malvidin derivative* | 16.72 |  | 565 | 331, 147 | √ |  |  | -- |
| 79 | Kaempferide derivative isomer | 17.40 | 623 |  | 299 (M-H-2 Glc.)-, 163 | √ |  |  | 29 |
| 80 | Unknown | 17.42 |  | 274 | 274, 256 (M+H-18)+, 210 (M+H-18 -46)+, 111, 105, 102, 88, 71 |  | √ | √ | -- |
| 81 | Unknown | 17.54 |  | 399 | 267, 253, 227 | √ |  |  | -- |
| 82 | L-ascorbic acid isomer | 17.82 |  | 177 | 133, 129, 127, 113, 103, 101, 57 |  | √ |  | 1 |
| 83 | Succinic acid isomer | 21.49 | 117 |  | 117, 99 |  | √ |  | 10 |
| 84 | Apiin isomer | 21.89 |  | 565 | 433 (M+H-132)+, 413, 271 (M+H-162-132)+ |  |  | √ | 5 |
| 85 | Methyl gallate derivative | 23.06 | 325 |  | 183 (M-H-142)- | √ |  |  | 29 |
| 86 | Gallocatechin derivative | 24.48 | 561 |  | 305 | √ |  |  | 21 |
| 87 | Succinic acid isomer | 24.96 | 117 |  | 99 |  | √ |  | 10 |
| 88 | Unknown | 25.01 |  | 515 | 515, 353. 331, 313, 239 |  |  | √ | -- |
| 89 | 4-Hydroxybenzoic acid isomer | 25.28 |  | 139 | 121, 111, 105, 97, 93, 79 | √ | √ |  | 1 |
| 90 | Succinic acid isomer | 26.11 | 117 |  | 117, 101, 99 | √ | √ |  | 10 |
| 91 | Unknown | 26.66 |  | 805 | 615, 606, 598, 413, 391, 279, 167, 149, 113 | √ |  |  | -- |
| 92 | Lutolin-7-glucronoide-3´/4´pentoside | 26.77 | 593 |  | 461 (M-H-132)-, 285 (M-H-132-176)-, 169 |  |  | √ | 11 |
| 93 | Peonidin dipentoside isomer* | 27.45 |  | 565 | 547, 301 (M+H-132-132)+, 259, 219, 133, 113, 85, 45 | √ |  | √ | -- |
| 94 | Tyrosol isomer | 27.55 |  | 121 | 93, 77 |  | √ |  | 3 |
| 95 | L-ascorbic acid isomer | 27.61 |  | 177 | 133, 129, 127, 113, 103, 101, 57 |  |  | √ | 1 |
| 96 | Delphinidin -3-(*p*-coumaroyl-glucoside) derivative | 28.36 |  | 799 | 611, 303 (M+H-188-308)+ |  | √ |  | 23 |
| 97 | Epicatechin derivative | 28.91 |  | 678 | 289 |  | √ |  | 6 |
| 98 | Kaempferol -8*C*- glucoside* | 29.40 |  | 449 | 329 (M+H-120)+, 299 (M+H-150)+ |  | √ |  | -- |
| 99 | Malvidin 3-*O*-glucoside derivative | 29.83 |  | 871 | 493, 331 | √ |  |  | 8 |
| 100 | Unknown | 30.00 |  | 871 | 593, 552, 369, 260, 105 |  |  | √ | -- |
| 101 | L-ascorbic acid isomer | 30.41 |  | 177 | 133, 129, 127, 113, 103, 101, 57 | √ | √ |  | 1 |
| 102 | Peonidin derivative* | 30.65 |  | 799 | 648 (M+H-galloyl)+, 301 (Peonidin) |  | √ |  | -- |
| 103 | Succinic acid isomer | 31.52 | 117 |  | 117, 99 | √ |  |  | 10 |

1= TMIC, 2019; 2= Zemmouri *et al.,* 2014; 3= Lambert *et al .,* 2015; 4= Moco, 2007; 5= Abu-Reidah *et al.,* 2015; 6= Quifer-Rada *et al*., 2014; 7= Nicoue, 2010; 8= Chang and Wong, 2004; 9= Bakr *et al.,* 2016; 10= AlKadhi *et al*., 2017; 11= Ferreres *et al.,* 2014; 12= Sinela *et al.,* 2017; 13= Ammar *et al.,* 2015; 14= Barreca *et al*., 2011; 15= Ibrahim *et al*., 2015; 16= Rodriguez-Rivera *et al*., 2014; 17= Simiriogiotis *et al.,* 2015; 18= Justesen, 2000; 19= Spinola *et al*., 2015; 20= Ledesma- Escobar *et al.,* 2015; 21= Hossain *et al.,* 2010; 22= Colombo *et al.,* 2008; 23= Stein-Chisholm *et al*., 2017; 24= Rodríguez-Medina *et al*., 2009a; 25= Barreca *et al.*, 2011; 26= Brito *et al.,* 2014; 27= Rodriguez *et al*., 2014; 28= Farag *et al.,* 2015; 29= Chernonosov *et al.,* 2017.

* = Tentative identified; Rt= Retention time; Rut.= Rutinose; Glc.= Glucose; HdA: *Hibiscus* *deflersii*; HcA: *H. calyphyllus;*  HmA: *H. micranthus*

**Table (2)**: IC50 of tested aqueous Hibiscus extractsof *Hibiscus deﬂersii* (HdA), *H. micranthus* (HmA), and *H. calyphyllus* (HcA) against A-549 and HTC-116 cells lines. The data are presented as µg/mL.

|  | **IC50 (µg/mL)** |  |
| --- | --- | --- |
| **Tested extracts** | **A-549 cell line** | **HCT-116 cell line** |
| **HdA** | 50 ± 5.1 | 96 ± 3.2 |
| **HcA** | 113 ± 3.4 | 92.9 ± 2.8 |
| **HmA** | 60.4 ± 1.7 | 56 ± 1.9 |
| **Cisplatin** | 7.53 ± 3.8 | 2.43 ± 4.1 |
|  |  |  |

These are the mean of three determinations

**Table (3)**: IC50 of tested aqueous Hibiscus extractsof *Hibiscus deﬂersii* (HdA), *H. micranthus* (HmA), and *H. calyphyllus* (HcA) against pancreatic lipase enzyme. The data are presented as µg/mL.

|  | **IC50 (µg/mL)** |
| --- | --- |
| **Tested extracts** |  |
| **HdA** | 95.45 ± 1.9 |
| **HcA** | >1000 |
| **HmA** | 107.7 ± 1.5 |
| **Orlistat standard** | 23.8 ± 0.7 |
|  |  |

These are the mean of three determinations
